1  
2 **Genetic risk, parental history, and suicide attempts in a diverse sample of US adolescents**  
3

4 Ran Barzilay, MD PhD<sup>1,2,3</sup>; Elina Visoki, MSc<sup>1,2</sup>; Laura M Schultz, PhD<sup>2,4</sup>; Varun Warriar,  
5 PhD<sup>5</sup>; Nikolaos P Daskalakis, MD PhD<sup>6,7</sup>; Laura Almasy, PhD<sup>2,4,8</sup>.

6  
7 <sup>1</sup> Department of Child and Adolescent Psychiatry and Behavioral Science, Children’s Hospital of  
8 Philadelphia (CHOP), Philadelphia, US

9 <sup>2</sup> Lifespan Brain Institute of CHOP and Penn Medicine, Philadelphia, US

10 <sup>3</sup> Department of Psychiatry, Perelman School of Medicine, University of Pennsylvania,  
11 Philadelphia, US

12 <sup>4</sup> Department of Biomedical and Health Informatics, Children’s Hospital of Philadelphia  
13 (CHOP),  
14 Philadelphia, PA, USA

15 <sup>5</sup> Department of Psychiatry, University of Cambridge, Cambridge, United Kingdom

16 <sup>6</sup> Department of Psychiatry, McLean Hospital, Harvard Medical School, Belmont, MA, USA

17 <sup>7</sup> Stanley Center for Psychiatric Research, Broad Institute of MIT and Harvard, Cambridge, MA,  
18 USA

19 <sup>8</sup> Department of Genetics, Perelman School of Medicine, University of Pennsylvania,  
20 Philadelphia, PA, USA

21  
22 **Keywords:** Suicide attempt; genetics; polygenic risk prediction; family history; adolescents.  
23

24 Running Title: PRS, parental history and youth suicide attempts

25 Manuscript word count: 1,276

26 Tables/Figures: 2 Tables; 1 Figure

27 Supplementary data: 2 Tables and 1 Figure  
28

29 **Corresponding Author:**

30 Corresponding author: Ran Barzilay MD PhD, 10th floor, Gates Building, Hospital of the  
31 University of Pennsylvania, 34th and Spruce Street, Philadelphia, PA 19104

32 Email: [ran.barzilay@penmedicine.upenn.edu](mailto:ran.barzilay@penmedicine.upenn.edu); [barzilayr@chop.edu](mailto:barzilayr@chop.edu)

33 Tel: +1 (484) 695 7937  
34

35 **Abstract**

36

37 **Background:** Adolescent suicide is a major health problem in the US marked by a recent  
38 increase in Black/African American youth suicide trends. While genetic factors partly account  
39 for familial transmission of suicidal behavior, it is not clear whether polygenic risk scores of  
40 suicide attempt have clinical utility in youth suicide risk classification.

41 **Objectives:** To evaluate the contribution of a polygenic risk score for suicide attempt (PRS-SA)  
42 in explaining variance in suicide attempt by early adolescence.

43 **Methods:** We studied N=5,214 non-related Black and White youth from the Adolescent Brain  
44 Cognitive Development (ABCD) Study (ages 8.9-13.8 years) who were evaluated between 2016  
45 and 2021. Regression models tested associations between PRS-SA and parental history of  
46 suicide attempt/death with youth-reported suicide attempt. Covariates included age, sex, and  
47 race.

48 **Results:** Over three waves of assessments, 182 youth (3.5%) reported a past suicide attempt,  
49 with Black youth reporting significantly more suicide attempts than their White counterparts  
50 (6.1% vs 2.8%,  $P<.001$ ). PRS-SA was associated with suicide attempt (odds ratio [OR]=1.3,  
51 95% confidence interval [CI] 1.1-1.5,  $P=.001$ ). Inclusion of PRS-SA explained 2.7% of the  
52 variance in suicide attempts, significantly more than the base model including only age, sex and  
53 race, which explained 1.9% of the variance ( $P=.001$ ). Parental history of suicide attempt/death  
54 was also associated with youth suicide attempt (OR=2.9, 95%CI 1.9-4.4,  $P<.001$ ). Addition of  
55 PRS-SA to the model that included parental history significantly increased the variance  
56 explained from 3.3% to 4% ( $P=.002$ ).

57 **Conclusions:** Findings suggest that PRS-SA may be useful for suicide risk classification in  
58 diverse youth.

59

60 **Contribution to the Field Statement**

61  
62 Adolescent suicidal behavior is a major health problem, with suicide being the 2<sup>nd</sup> leading cause  
63 of death in youth. Research that improves our understanding regarding drivers of suicide risk in  
64 youth can inform youth suicide prevention strategies. Family history of suicide is an established  
65 risk factor for youth suicidal behavior. Current methods in psychiatric genetics allow calculation  
66 of polygenic risk scores that represent genetic liability to specific conditions. It is not clear  
67 whether polygenic risk score of suicide attempt can assist in risk classification, beyond family  
68 history. In this work, we show that in a sample of 5,214 youth ages 9-13, of which 3.5% reported  
69 past suicide attempt, polygenic score of suicide attempt was associated with youth suicide  
70 attempt. This association additively explained variance over and above parental history of  
71 suicide attempt/death. Findings make a case for the potential utility of incorporating polygenic  
72 risk scores as part of suicide attempt risk classification in youth, and suggest that polygenic  
73 scores may reveal genetic liability that is not captured by family history of suicide.

74  
75  
76  
77

## 78 **Introduction**

79 Suicide is the second leading cause of death in US adolescents (1). The rising rates of  
80 suicide among Black or African American youth is especially concerning (2). Suicide attempt is  
81 a complex behavior driven by genetic and environmental factors (3). Clinicians often use  
82 parental history of suicide attempt/death to estimate suicide risk (4). The potential of using  
83 polygenic scores of psychiatric phenotypes to assess genetic suicide risk is uncertain (5). It is not  
84 known whether polygenic score of suicide attempts (PRS-SA) can contribute to suicide risk  
85 classification, and whether PRS-SA adds useful information beyond the commonly used risk  
86 assessment based on parental history.

87 The Adolescent Brain Cognitive Development (ABCD) Study follows diverse genotyped  
88 US youth from ages 9-10 into adolescence (6). The study collects data on parental history of  
89 psychiatric conditions (7), including suicide attempt/death. Participants are evaluated annually  
90 for history of suicide attempts, and endorsement of suicide attempts in Black participants is  
91 significantly higher (8). Here we aimed to evaluate the contribution of PRS-SA in explaining  
92 variance in self-reported suicide attempt by early adolescence, and to determine the additive  
93 effect of this score over and above parental history of suicide attempt/death.

## 94 **Methods**

### 95 **Participants**

96 We included N=5,214 non-related ABCD Study participants of African and European  
97 ancestry (based on genetic principal components (9)) that had data on parental history of suicide  
98 attempt or death (n=302 missing such data were excluded from analyses). Of the total sample,  
99 n=1,086 had African ancestry (of whom 988 [97.1%] parent-reported as Black race and 71  
100 [6.6%] parent-reported as Hispanic); and n=4,128 had European ancestry (of whom 4,093  
101 [99.2%] parent-reported as White race and 123 [3%] parent-reported as Hispanic). The ABCD  
102 Study® protocol was approved by the University of California, San Diego Institutional Review  
103 Board (IRB), and was exempted from a full review by University of Pennsylvania IRB.

### 104 **Variables**

#### 105 **Exposures**

##### 106 *Polygenic risk score of suicide attempt*

107 ABCD Study genotype data was processed as described before (9). Polygenic risk scores  
108 were calculated separately for African- and European-ancestry participants using PRSice-2 (10),  
109 with summary statistics from a recent genome-wide association study (GWAS) of suicide  
110 attempters that included diverse ancestries (11). We tested eight P-value thresholds (Pt): 0.0001,  
111 0.001, 0.01, 0.05, 0.1, 0.3, 0.5, and 1. Ten within-ancestry genetic principal components were  
112 regressed out of z-scored polygenic scores.  
113

##### 114 *Parental history of suicide attempt*

115 Parental history was evaluated using parent reports on parents' suicide attempt/death  
116 (variable: "famhx\_ss\_momdad\_scd\_p").  
117

#### 118 **Outcome measure**

119 Self-report of suicide attempt in any of the three first ABCD Study assessments.  
120 Participants were considered controls if they denied history of suicide attempt in all three  
121 assessments.  
122  
123

124

## 125 **Statistical Analyses**

126 Analyses were conducted from January-March 2022 using ABCD Study data release 4.0.

127 Data preprocessing and analysis are detailed

128 at [https://github.com/barzilab1/ABCD\\_SA\\_genetics\\_FH](https://github.com/barzilab1/ABCD_SA_genetics_FH).

129 Mean (standard deviation [SD]) and frequency (%) were reported for descriptive  
130 purposes. Univariate comparisons were made using t-test or chi-square tests, as appropriate. We  
131 used two-tailed tests for all statistical models. We imputed age for participants who did not  
132 complete the 2-year follow-up assessment (n=21, 0.4%). We used R version 4.1.0. for data  
133 analyses.

134 We estimated binary logistic regression models with suicide attempt as the dependent  
135 variable and PRS-SA as the independent variable, co-varying for age, sex and parent-reported  
136 race. A GWAS P-value threshold of  $P=0.05$  was selected for the PRS-SA, to derive the highest  
137 Nagelkerke's  $R^2$  and lowest P-value of PRS-SA in association with suicide attempt. We used a  
138 permutation test to validate this selection (see figure in the online supplement). Association of  
139 PRS-SA with suicide attempt was consistent across multiple P-value threshold tested (see table 1  
140 in the online supplement).

141 To test the additive effects of PRS-SA in explaining variance in suicide attempt, we  
142 estimated regression models with and without PRS-SA and compared the goodness of fit using  
143 the likelihood ratio test.

144 In sensitivity analyses, to address the potential bias of PRS-SA performance in African  
145 versus European ancestry, we estimated models stratified by ancestry and then meta-analyzed the  
146 results.

147

## 148 **Results**

149 Among the 5,214 participants, 182 (3.5%) endorsed having made a suicide attempt at  
150 least once in the three ABCD Study assessments. History of suicide attempt was more frequent  
151 among Black youth (66 of 1,087, 6.1%) than among their White counterparts (116 of 4,127,  
152 2.8%, Chi-square  $P<.001$ ). No age or sex associations were observed. Participants who endorsed  
153 suicide attempt had more parental history of suicide attempt/death (14.8% versus 5.5%,  
154 respectively, Chi-square  $P<.001$ ). **Table 1** includes univariate comparisons between participants  
155 with and without history of a suicide attempt.

156 PRS-SA was significantly associated with suicide attempt in the full sample (odds ratio  
157 [OR]= 1.3, 95% confidence interval [CI] 1.1-1.5,  $P=.001$ , co-varying for demographics: age, sex,  
158 parent-reported race, and accounting for ten within-ancestry genetic principal components). This  
159 model explained 2.7% of the variance (Nagelkerke's  $R^2=0.027$ ), significantly more than the base  
160 model that only included covariates (Nagelkerke's  $R^2=0.019$ , likelihood ratio Chi-square test,  
161  $P=.001$ ). **Figure 1** illustrates the association between PRS-SA and suicide attempt rate.

162 Parental history of suicide attempt/death was associated with youth's history of suicide  
163 attempt (OR=2.9, 95%CI= 1.9-4.4,  $P<.001$ ). Adding PRS-SA to this model increased the  
164 variance explained from 3.3% to 4% (likelihood ratio chi-square test,  $P=.002$ ). The improvement  
165 in model performance ( $\Delta R^2=0.7\%$ ) obtained when adding SA-PRS was on the order of 50% of  
166 the  $\Delta R^2$  obtained from adding parental history to the base model ( $\Delta R^2=1.4\%$ , from 1.9% to  
167 3.3%). Statistics for all models are detailed in **Table 2**.

168 Finally, sensitivity analyses estimating the above models stratified by ancestry (African  
169 or European) and meta-analyzed yielded similar results in direction and statistical significance  
170 (see table 2 in the online supplement).

171

## 172 **Discussion**

173 We present evidence suggesting clinical utility of a polygenic score explaining suicide  
174 attempt in Black and White US youth. Two main strengths of this work are noteworthy. First, the  
175 focus on suicide attempt highlights the clinical significance of the findings. Notably, most  
176 research in this age range lumps ideation and attempt together (12–14), even though most  
177 ideators do not make an attempt (3,15). Second, the inclusion of Black youth in the current work  
178 is critical to address racial disparities in psychiatric genetics research (16). This disparity is  
179 especially concerning in the field of youth suicide, where Black US youth are particularly  
180 vulnerable (2,17). Our findings extend recent ABCD Study results showing associations of  
181 depression polygenic risk score with suicide attempt in an analysis limited to European ancestry  
182 (18) and schizophrenia polygenic risk score with suicide attempt reported in the baseline ABCD  
183 Study assessment in admixed population with substantially fewer suicide attempt participants (64  
184 versus 182 in the current analysis) (19).

185 We found that PRS-SA additively explains variance in suicide attempt beyond parental  
186 history of suicide attempt/death. *From a clinical perspective*, assessment of family history is  
187 common practice for clinicians to help their risk classification. We believe that clinicians can  
188 intuitively appreciate the value of PRS-SA when it is compared to this benchmark of clinical  
189 good practice. *From a research perspective*, considering skepticism in the field toward  
190 incorporating PRS in multivariable predictive algorithms in psychiatry (5), our findings provide  
191 support for incorporation of genetic scores, including that of suicide attempt, in suicide risk  
192 prediction (20).

193 One key limitation should be noted. The variance explained by addition of PRS-SA to  
194 models of parental history is still relatively small. We believe that with growing power/ sample  
195 sizes of GWAS in more diverse samples, the added value of PRS will increase, especially in  
196 diverse populations.

197

## 198 **Conclusions**

199 In this cohort of young adolescents, PRS-SA was associated with suicide attempts and  
200 significantly improved models explaining variance over and above parental history of suicide  
201 attempt/death, which is commonly used in clinical settings to assess suicide risk. Findings  
202 suggest that PRS-SA may be useful for suicide risk classification in both Black and White youth.

203

204

205 **Acknowledgement:** Data used in the preparation of this article were obtained from the  
206 Adolescent Brain Cognitive DevelopmentSM (ABCD) Study (<https://abcdstudy.org>), held in the  
207 NIMH Data Archive (NDA). This is a multisite, longitudinal study designed to recruit more than  
208 10,000 children age 9-10 and follow them over 10 years into early adulthood. The ABCD  
209 Study® is supported by the National Institutes of Health and additional federal partners under  
210 award numbers U01DA041048, U01DA050989, U01DA051016, U01DA041022,  
211 U01DA051018, U01DA051037, U01DA050987, U01DA041174, U01DA041106,  
212 U01DA041117, U01DA041028, U01DA041134, U01DA050988, U01DA051039,  
213 U01DA041156, U01DA041025, U01DA041120, U01DA051038, U01DA041148,  
214 U01DA041093, U01DA041089, U24DA041123, U24DA041147. A full list of supporters is  
215 available at <https://abcdstudy.org/federal-partners.html>. A listing of participating sites and a  
216 complete listing of the study investigators can be found  
217 at [https://abcdstudy.org/consortium\\_members/](https://abcdstudy.org/consortium_members/). ABCD consortium investigators designed and  
218 implemented the study and/or provided data but did not necessarily participate in analysis or  
219 writing of this report. This manuscript reflects the views of the authors and may not reflect the  
220 opinions or views of the NIH or ABCD consortium investigators.

221  
222 **Funding/Support:** This study was supported by the National Institute of Mental Health grants  
223 K23MH120437 (RB), R21MH123916 (RB), and the Lifespan Brain Institute of Children’s  
224 Hospital of Philadelphia and Penn Medicine, University of Pennsylvania. The funding  
225 organization had no role in the design and conduct of the study; collection, management,  
226 analysis, and interpretation of the data; preparation, review, or approval of the manuscript; and  
227 decision to submit the manuscript for publication.

228 **Author Contributions Statement:** RB conceptualized the study question and study design,  
229 interpreted the findings and wrote the first draft of the manuscript. EV curated and processed the  
230 phenotypic data and conducted data analysis. LS processed all genomic data, calculated  
231 polygenic risk score and supervised statistical analyses. VW and ND substantially helped in  
232 study conceptualization, data interpretation and preparation of the first draft of the manuscript.  
233 LA supervised study conceptualization and all statistical analyses and contributed to data  
234 interpretation. All authors made substantial contribution to editing and revising the manuscript to  
235 its final version.

236  
237 **Conflict of Interest Disclosures:** Dr Barzilay serves on the scientific board and receives  
238 consulting fees from ‘Taliaz Health’ and ‘Zynerba Pharmaceuticals’ and reports stock ownership  
239 in ‘Taliaz Health’, with no conflict of interest relevant to this work. Elina Visoki’s spouse is a  
240 shareholder and executive in ‘Kidas’, with no conflict of interest relevant to this work. In the past  
241 3 years, Dr. Daskalakis has been a consultant for Sunovion Pharmaceuticals and is on the  
242 scientific advisory board for Sentio Solutions and Circular Genomics for unrelated work. All  
243 other authors have no conflicts of interest to declare.

244  
245

246 References

- 247 1. National Center for Health Statistics, National Vital Statistics System. WISQARS Leading  
248 Causes of Death Reports, National and Regional, 1981-2019. *Centers for Disease Control  
249 and Prevention* (2020)
- 250 2. Ramchand R, Gordon JA, Pearson JL. Trends in Suicide Rates by Race and Ethnicity in  
251 the United States. *JAMA Network Open* (2021) **4**:e2111563. doi:  
252 10.1001/jamanetworkopen.2021.11563
- 253 3. Turecki G, Brent DA. Suicide and suicidal behaviour. *The Lancet* (2016) **387**:1227–1239.  
254 doi: 10.1016/S0140-6736(15)00234-2
- 255 4. Geulayov G, Gunnell D, Holmen TL, Metcalfe C. The association of parental fatal and  
256 non-fatal suicidal behaviour with offspring suicidal behaviour and depression: a  
257 systematic review and meta-analysis. *Psychological Medicine* (2012) **42**:1567–1580. doi:  
258 10.1017/S0033291711002753
- 259 5. Wray NR, Lin T, Austin J, McGrath JJ, Hickie IB, Murray GK, Visscher PM. From Basic  
260 Science to Clinical Application of Polygenic Risk Scores: A Primer. *JAMA Psychiatry*  
261 (2021) **78**:101–109. doi: 10.1001/JAMAPSYCHIATRY.2020.3049
- 262 6. Barch DM, Albaugh MD, Avenevoli S, Chang L, Clark DB, Glantz MD, Hudziak JJ,  
263 Jernigan TL, Tapert SF, Yurgelun-Todd D, et al. Demographic, physical and mental  
264 health assessments in the adolescent brain and cognitive development study: Rationale  
265 and description. *Developmental Cognitive Neuroscience* (2018) **32**:55–66. doi:  
266 10.1016/J.DCN.2017.10.010
- 267 7. van Dijk MT, Murphy E, Posner JE, Talati A, Weissman MM. Association of  
268 Multigenerational Family History of Depression with Lifetime Depressive and Other  
269 Psychiatric Disorders in Children: Results from the Adolescent Brain Cognitive  
270 Development (ABCD) Study. *JAMA Psychiatry* (2021) doi:  
271 10.1001/jamapsychiatry.2021.0350
- 272 8. Argabright ST, Visoki E, Moore TM, Ryan DT, DiDomenico GE, Njoroge WFM, Taylor  
273 JH, Guloksuz S, Gur RC, Gur RE, et al. Association Between Discrimination Stress and  
274 Suicidality in Preadolescent Children. *Journal of the American Academy of Child &  
275 Adolescent Psychiatry* (2021) **0**: doi: 10.1016/J.JAAC.2021.08.011
- 276 9. Schultz LM, Merikangas AK, Ruparel K, Jacquemont S, Glahn DC, Gur RE, Barzilay R,  
277 Almasy L. Stability of polygenic scores across discovery genome-wide association  
278 studies. *Human Genetics and Genomics Advances* (2022) **3**:100091. doi:  
279 10.1016/J.XHGG.2022.100091
- 280 10. Choi SW, O'Reilly PF. PRSice-2: Polygenic Risk Score software for biobank-scale data.  
281 *Gigascience* (2019) **8**: doi: 10.1093/GIGASCIENCE/GIZ082
- 282 11. Mullins N, Kang JE, Campos AI, Coleman JRI, Edwards AC, Galfalvy H, Levey DF, Lori  
283 A, Shabalín A, Starnawska A, et al. Dissecting the Shared Genetic Architecture of Suicide  
284 Attempt, Psychiatric Disorders, and Known Risk Factors. *Biological Psychiatry* (2022)  
285 **91**:313–327. doi: 10.1016/J.BIOPSYCH.2021.05.029
- 286 12. Janiri D, Doucet GE, Pompili M, Sani G, Luna B, Brent DA, Frangou S. Risk and  
287 protective factors for childhood suicidality: a US population-based study. *The Lancet  
288 Psychiatry* (2020) **7**:317–326. doi: 10.1016/S2215-0366(20)30049-3
- 289 13. Shoval G, Visoki E, Moore TM, DiDomenico GE, Argabright ST, Huffnagle NJ,  
290 Alexander-Bloch AF, Waller R, Keele L, Benton TD, et al. Evaluation of Attention-  
291 Deficit/Hyperactivity Disorder Medications, Externalizing Symptoms, and Suicidality in



- 292 Children. *JAMA Network Open* (2021) **4**:e2111342–e2111342. doi:  
293 10.1001/JAMANETWORKOPEN.2021.11342
- 294 14. Daskalakis NP, Schultz LM, Visoki E, Moore TM, Argabright ST, Harnett NG,  
295 DiDomenico GE, Warriar V, Almasy L, Barzilay R. Contributions of PTSD polygenic risk  
296 and environmental stress to suicidality in preadolescents. *Neurobiology of Stress* (2021)  
297 **15**:100411. doi: 10.1016/J.YNSTR.2021.100411
- 298 15. Cha CB, Franz PJ, M. Guzmán E, Glenn CR, Kleiman EM, Nock MK. Annual Research  
299 Review: Suicide among youth – epidemiology, (potential) etiology, and treatment.  
300 *Journal of Child Psychology and Psychiatry* (2018) **59**:460–482. doi:  
301 10.1111/JCPP.12831
- 302 16. Martin AR, Kanai M, Kamatani Y, Okada Y, Neale BM, Daly MJ. Clinical use of current  
303 polygenic risk scores may exacerbate health disparities. *Nature Genetics* (2019) **51**:584–  
304 591. doi: 10.1038/s41588-019-0379-x
- 305 17. Ring the Alarm: the Crisis of Black Youth Suicide in America | Suicide Prevention  
306 Resource Center. [https://www.sprc.org/news/ring-alarm-crisis-black-youth-suicide-](https://www.sprc.org/news/ring-alarm-crisis-black-youth-suicide-america)  
307 [america](https://www.sprc.org/news/ring-alarm-crisis-black-youth-suicide-america) [Accessed May 27, 2021]
- 308 18. Lee PH, Doyle AE, Li X, Silberstein M, Jung J-Y, Gollub RL, Nierenberg AA, Liu RT,  
309 Kessler RC, Perlis RH, et al. Genetic Association of Attention-Deficit/Hyperactivity  
310 Disorder and Major Depression With Suicidal Ideation and Attempts in Children: The  
311 Adolescent Brain Cognitive Development Study. *Biological Psychiatry* (2021) doi:  
312 10.1016/J.BIOPSYCH.2021.11.026
- 313 19. Joo YY, Moon S-Y, Wang H-H, Kim H, Lee E-J, Kim JH, Posner J, Ahn W-Y, Choi I,  
314 Kim J-W, et al. Association of Genome-Wide Polygenic Scores for Multiple Psychiatric  
315 and Common Traits in Preadolescent Youths at Risk of Suicide. *JAMA Network Open*  
316 (2022) **5**:e2148585–e2148585. doi: 10.1001/JAMANETWORKOPEN.2021.48585
- 317 20. Kirtley OJ, van Mens K, Hoogendoorn M, Kapur N, de Beurs D. Translating promise into  
318 practice: a review of machine learning in suicide research and prevention. *The Lancet*  
319 *Psychiatry* (2022) **9**:243–252. doi: 10.1016/S2215-0366(21)00254-6  
320  
321

322 **Tables and Figure**

323

324 **Table 1- Sample characteristics**

|                                                   | <b>Total sample<br/>N=5 214</b> | <b>Control<br/>n=5 032</b> | <b>Suicide attempt<br/>n=182</b> | <b>P-value</b> |
|---------------------------------------------------|---------------------------------|----------------------------|----------------------------------|----------------|
| <b>Age, years, mean (SD)</b>                      | 12.04 (0.65)                    | 12.04 (0.65)               | 12.09 (0.66)                     | 0.325          |
| <b>Female sex, No. (%)</b>                        | 2 408 (46.2)                    | 2 319 (46.1)               | 89 (48.9)                        | 0.501          |
| <b>Race Black, No. (%)</b>                        | 1 087 (20.8)                    | 1 021 (20.3)               | 66 (36.3)                        | <0.001         |
| <b>Parent suicide attempt/death, No. (%)</b>      | 306 (5.9)                       | 279 (5.5)                  | 27 (14.8)                        | <0.001         |
| <b>Suicide attempt PRS<sup>a</sup>, mean (SD)</b> | 0.00 (0.95)                     | -0.01 (0.95)               | 0.21 (0.89)                      | 0.001          |

325 <sup>a</sup> PRS after standardizing the raw PRS produced at a GWAS P-value threshold of 0.05 and then  
 326 regressing out the first ten within-ancestry genetic principal components.  
 327 Abbreviations: PRS= polygenic risk score; GWAS= Genome wide association study.  
 328  
 329

330 **Figure 1- Polygenic risk score for suicide attempt (PRS-SA) and suicide attempt in Black**  
 331 **and White youth.**

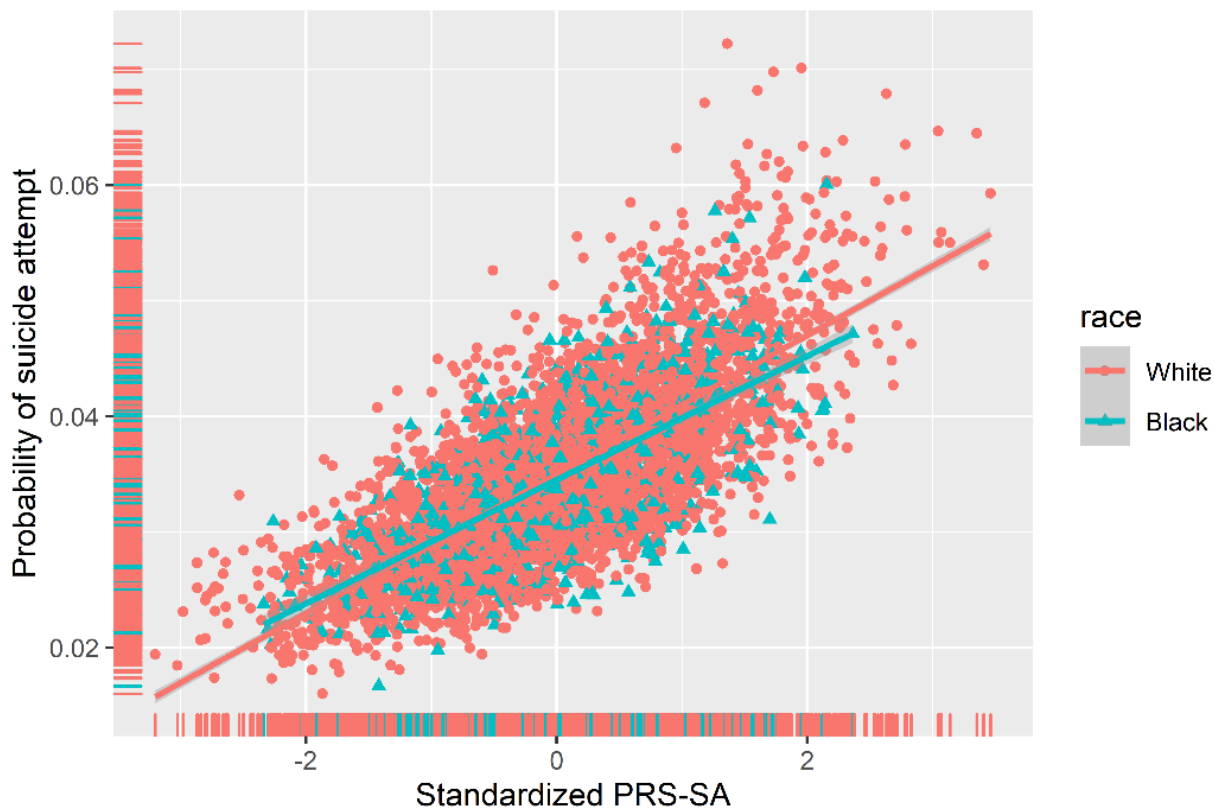

332 Scatter plots and regression lines show estimated probabilities of suicide attempt in 5 214  
 333 adolescents obtained from a binary logistic regression model with PRS-SA, age and sex as  
 334 independent variables. X-axis represents PRS-SA score (after standardizing the raw PRS produced  
 335 at a GWAS P-value threshold of 0.05 and then regressing out the first ten within-ancestry genetic  
 336 ancestry principal components). Y-axis represents predicted probability of suicide attempt.  
 337

**Table 2- Association of suicide attempt PRS, parental history of suicide attempt/death and suicide attempt.**

| Predictors                         | Model 1 |             |        | Model 2 <sup>a</sup> |             |        | Model 3 <sup>b</sup> |             |        | Model 4 <sup>c</sup> |             |        |
|------------------------------------|---------|-------------|--------|----------------------|-------------|--------|----------------------|-------------|--------|----------------------|-------------|--------|
|                                    | OR      | 95% CI      | P      | OR                   | 95% CI      | P      | OR                   | 95% CI      | P      | OR                   | 95% CI      | P      |
| Age                                | 1.01    | 0.99 – 1.03 | 0.225  | 1.01                 | 0.99 – 1.03 | 0.201  | 1.01                 | 0.99 – 1.03 | 0.237  | 1.01                 | 0.99 – 1.03 | 0.202  |
| Female sex                         | 1.12    | 0.83 – 1.50 | 0.468  | 1.11                 | 0.83 – 1.50 | 0.473  | 1.13                 | 0.84 – 1.52 | 0.423  | 1.13                 | 0.84 – 1.52 | 0.424  |
| Black race                         | 2.25    | 1.64 – 3.06 | <0.001 | 2.3                  | 1.67 – 3.12 | <0.001 | 2.23                 | 1.62 – 3.03 | <0.001 | 2.28                 | 1.66 – 3.11 | <0.001 |
| Suicide attempt PRS <sup>d</sup>   |         |             |        | 1.3                  | 1.11 – 1.53 | 0.001  |                      |             |        | 1.29                 | 1.10 – 1.52 | 0.002  |
| Parental suicide risk <sup>e</sup> |         |             |        |                      |             |        | 2.91                 | 1.86 – 4.40 | <0.001 | 2.84                 | 1.81 – 4.29 | <0.001 |
| Observations                       |         | 5,214       |        |                      | 5,214       |        |                      | 5,214       |        |                      | 5,214       |        |
| Nagelkerke R <sup>2</sup>          |         | 0.019       |        |                      | 0.027       |        |                      | 0.033       |        |                      | 0.04        |        |

Binary logistic regression models with age, sex, race, PRS and parental history of suicide attempt/death as independent variables and self-reported suicide attempt as the dependent variable

<sup>a</sup> Model 2 significantly explains more variance than Model 1 (likelihood ratio chi-square test, P = 0.001168)

<sup>b</sup> Model 3 significantly explains more variance than Model 1 (likelihood ratio chi-square test, P = 1.157e-05)

<sup>c</sup> Model 4 significantly explains more variance than Model 3 (likelihood ratio chi-square test, P = 0.001845)

<sup>d</sup> PRS after standardizing the raw PRS produced by PRSice-2 at a GWAS P-value threshold of .05 and then regressing out the first ten within-ancestry genetic ancestry principal components

<sup>e</sup> Suicide attempt/death

Abbreviations: PRS= polygenic risk score; GWAS= Genome wide association study.
